# Supplementary material for: Crystal form selectivity by humidity control: the case of the ionic co-crystals of nicotinamide and CaCl2
Source: Royal Society of Chemistry journal article supplement (doi:10.1039/c4ce00464g), 2014-01-01
Supplement: c4ce00464g1.pdf [file c4ce00464g1.pdf]

# Supplementary Information

## for

### Crystal form selectivity by humidity control: the case of the ionic co-crystals of nicotinamide and $\text{CaCl}_2$

Dario Braga,<sup>a</sup> Fabrizia Grepioni,<sup>a</sup> Giulio I. Lampronti,<sup>\*b</sup> Lucia Maini,<sup>\*a</sup> Katia Rubini,<sup>a</sup> Federico Zorzi,<sup>c</sup> Alessandro Turrina<sup>d</sup>

#### TGA measurements.

Despite all attempts to obtain pure compounds, the TGA curves suggests the presences of a small amount of  $\text{CaCl}_2 \cdot \text{XH}_2\text{O}$ . It is known that the dehydration process of  $\text{CaCl}_2 \cdot \text{XH}_2\text{O}$  strongly depends on the heating rate and a recent study shows that at  $\sim 142^\circ\text{C}$  there is a complete conversion of  $\text{CaCl}_2 \cdot 6\text{H}_2\text{O}$  to the anhydrous form.<sup>1</sup>

In figure S.I. 1 the small step between  $90\text{--}130^\circ\text{C}$  could be ascribed to the release of water due to the presence of small percentage of  $\text{CaCl}_2 \cdot \text{XH}_2\text{O}$  not detectable by X-ray diffraction, while step between  $130^\circ\text{C}$  to  $200^\circ\text{C}$  the release of the crystallization water molecule of  $\text{Nic} \cdot \text{CaCl}_2 \cdot \text{H}_2\text{O}$  (calc 7.16% obs. 6.59%) and the formation of the anhydrous form. At  $250^\circ\text{C}$  the decomposition occurred.

The variable temperature XRD shows no changes in the pattern between  $90^\circ\text{C}$ – $130^\circ\text{C}$  also after the sample was kept at  $100^\circ\text{C}$  for 1 hour (see figure S.I. 2)

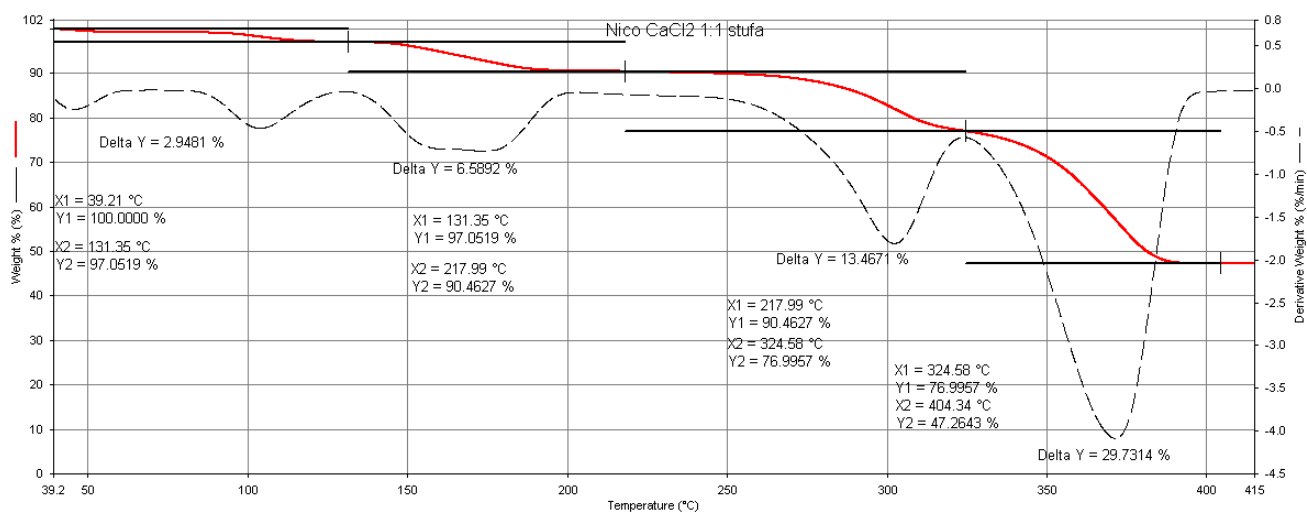

Figure SI 1. TGA curves of  $\text{Nic} \cdot \text{CaCl}_2 \cdot \text{H}_2\text{O}$ . Sample obtained by kneading  $\text{CaCl}_2$  anhydrous and Nicotinamide with 1 drop of ethanol. The sample was kept at  $75^\circ\text{C}$  for at least 1 hour to remove adsorbed water. The first step between  $90^\circ\text{C}$ – $140^\circ\text{C}$  is ascribable to the release of water due to the presence of  $\text{CaCl}_2 \cdot \text{xH}_2\text{O}$ .

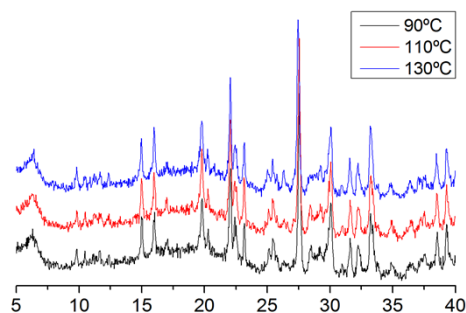

Figura SI 2. Variable temperature XRD patterns of  $\text{Nic}\cdot\text{CaCl}_2\cdot\text{H}_2\text{O}$  powder. No ICC phase transition is detected in the range 90-130C

$\text{Nic}\cdot\text{CaCl}_2\cdot 4\text{H}_2\text{O}$  loses three water molecules before 90°C. After this temperature the thermogram is comparable to that one observed for  $\text{Nic}\cdot\text{CaCl}_2\cdot\text{H}_2\text{O}$ ; also in this case there is a step between 90°-130°C is due to the presence of a small percentage of  $\text{CaCl}_2\cdot\text{XH}_2\text{O}$  ( Figure S.I. 3)

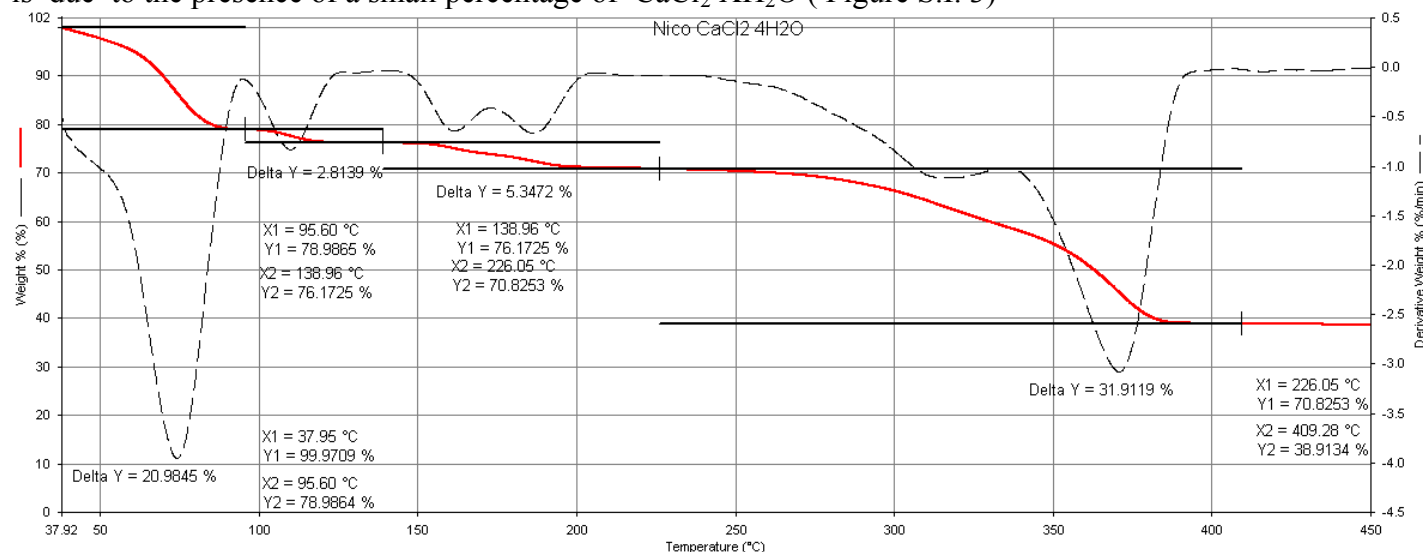

Figure SI 3. TGA curves of  $\text{Nic}\cdot\text{CaCl}_2\cdot 4\text{H}_2\text{O}$ . Sample obtained exposing  $\text{Nic}\cdot\text{CaCl}_2\cdot\text{H}_2\text{O}$  to HR 75%.

### Rietveld refinements of patterns collected on powders exposed to different RH

Rietveld refinement of the diffractogram collected on the sample of  $\text{Nic}\cdot\text{CaCl}_2$  after been exposed to HR 12% for two weeks ( $2\theta$  range 5-40°, step size 0.02°, time/step 20 s, 0.04 rad soller, kVxmA 40x40). The pattern has been described by two crystalline phases:  $\text{Nic}\cdot\text{CaCl}_2$  and  $\text{Nic}\cdot\text{CaCl}_2\cdot\text{H}_2\text{O}$ . The refinement converged to  $R_{wp} = 8.635\%$  and  $\chi^2 = 1.734$  values

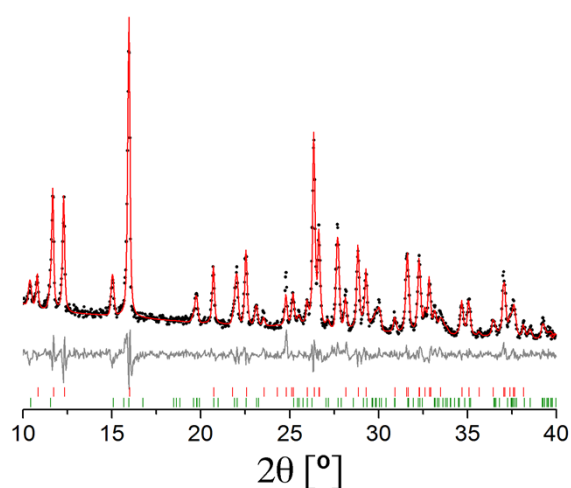

Figure S.I. 4 Experimental (black dots), calculated (red line) and difference (grey line) patterns for **Nic·CaCl<sub>2</sub>·H<sub>2</sub>O** (black line) after two weeks at 12% RH. Peak positions are marked in red and green for **Nic·CaCl<sub>2</sub>** and **Nic·CaCl<sub>2</sub>·H<sub>2</sub>O** respectively

Rietveld refinement of the diffractogram collected on the sample of **Nic·CaCl<sub>2</sub>** after been exposed to HR 53% for two weeks ( $2\theta$  range 5-40°, step size 0.02°, time/step 20 s, 0.04 rad soller, kVxmA 40x40). The pattern has been modelled using three phases: **Nic·CaCl<sub>2</sub>·H<sub>2</sub>O**, triclinic **CaCl<sub>2</sub>·4H<sub>2</sub>O** and trigonal **CaCl<sub>2</sub>·2H<sub>2</sub>O**. The refinement converged to  $R_{wp} = 8.777\%$  and  $\chi^2 = 1.426$  values.

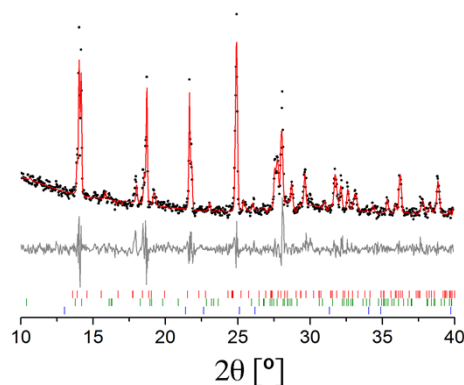

Figure S.I. 5 Experimental (black dots), calculated (red line) and difference (grey line) patterns for **Nic·CaCl<sub>2</sub>·H<sub>2</sub>O** (black line) after two weeks at 54% RH. Peak positions are marked in red, green and blue for **Nic<sub>2</sub>·CaCl<sub>2</sub>·2H<sub>2</sub>O**, **CaCl<sub>2</sub>·4H<sub>2</sub>O** and **CaCl<sub>2</sub>·2H<sub>2</sub>O** respectively.
